# Supplementary material for: A chemiluminescent aptasensor for simultaneous detection of three antibiotics in milk
Source: Royal Society of Chemistry journal article supplement (doi:10.1039/c6ay02304e), 2016-01-01
Supplement: c6ay02304e1.pdf [file c6ay02304e1.pdf]

**Supplementary Material**

A Chemiluminescent Aptasensor for Simultaneous Detection of Three Antibiotics in Milk

Liling Hao<sup>a</sup>, Huajie Gu<sup>a</sup>, Nuo Duan<sup>a</sup>, Shijia Wu<sup>a</sup>, Zhouping Wang<sup>a\*</sup>

*<sup>a</sup> State Key Laboratory of Food Science and Technology, Synergetic Innovation Center of Food Safety  
and Nutrition, School of Food Science and Technology,*

*Jiangnan University, Wuxi 214122, China*

\* Corresponding author:

Tel & Fax: 86-510-85917023

E-mail: wangzp@jiangnan.edu.cn

---

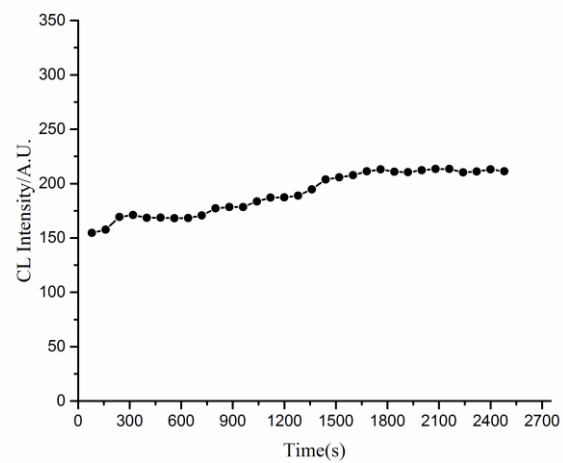

Fig. S1 CL kinetic curves for the reaction of 0.2 M H<sub>2</sub>O<sub>2</sub> and 0.05 M PIP with AuNFs in microtiter plates

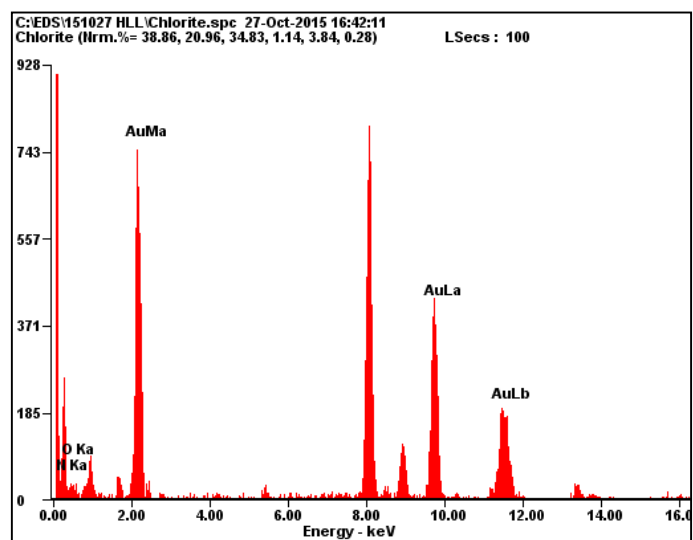

Fig. S2 EDS of the as-prepared ABEI-AuNFs

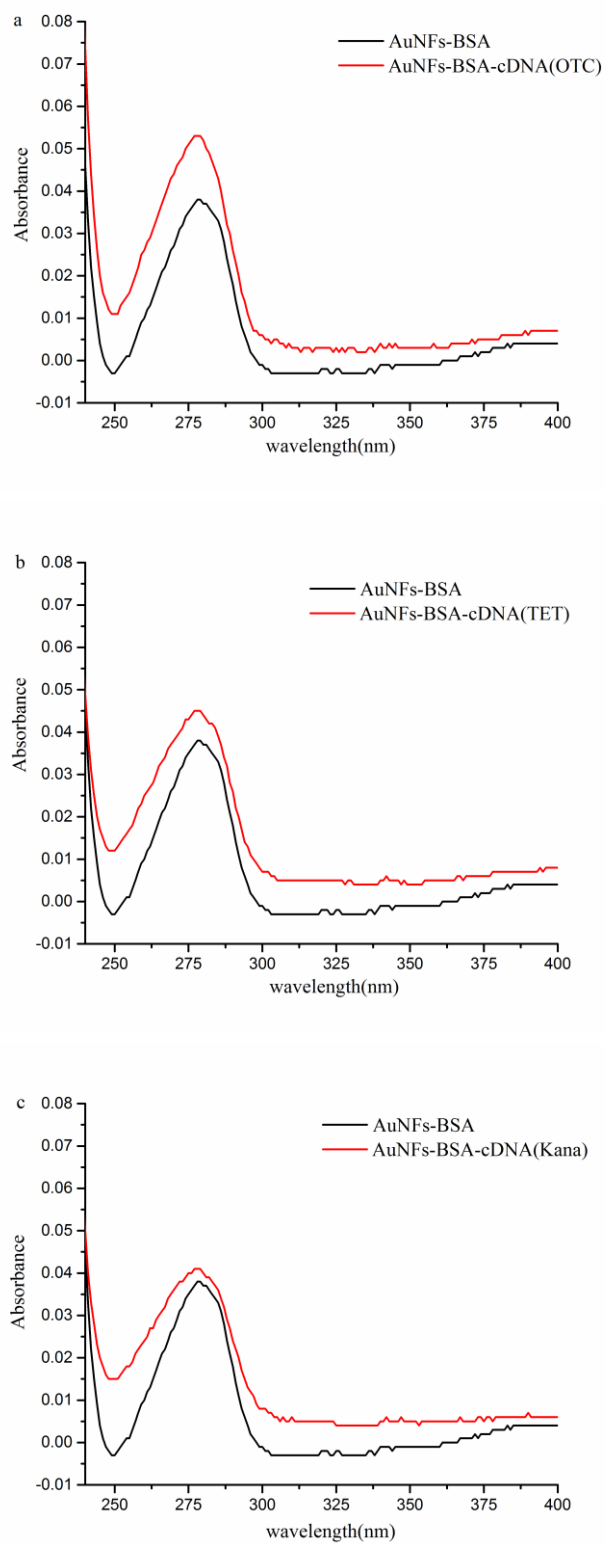

Fig. S3 UV-vis absorption spectrum before and after cDNA linked with ABEI-AuNFs-BSA: a, ABEI-AuNFs-BSA and ABEI-AuNFs-BSA-cDNA (OTC), b, ABEI-AuNFs-BSA and ABEI-AuNFs-BSA-cDNA (TET), c, ABEI-AuNFs-BSA and ABEI-AuNFs-BSA-cDNA (Kana)

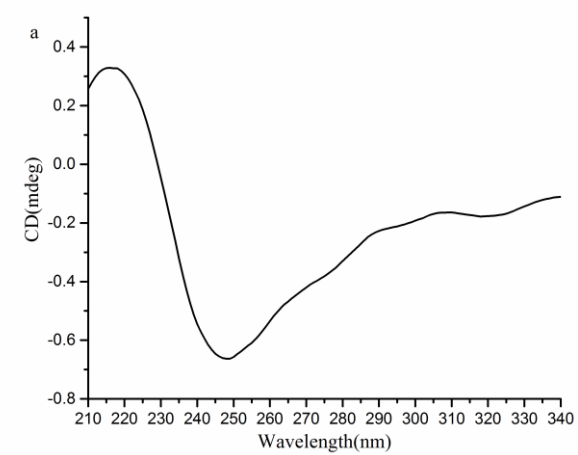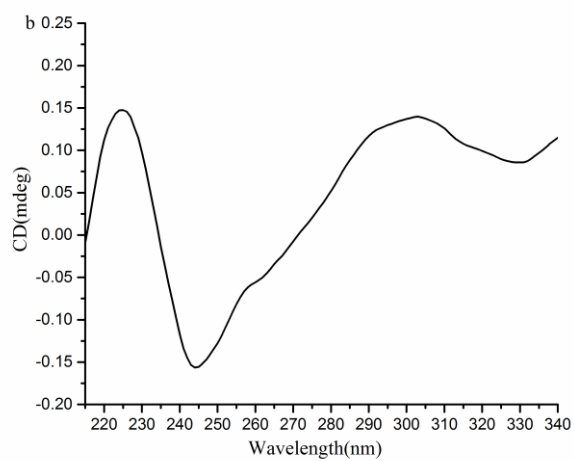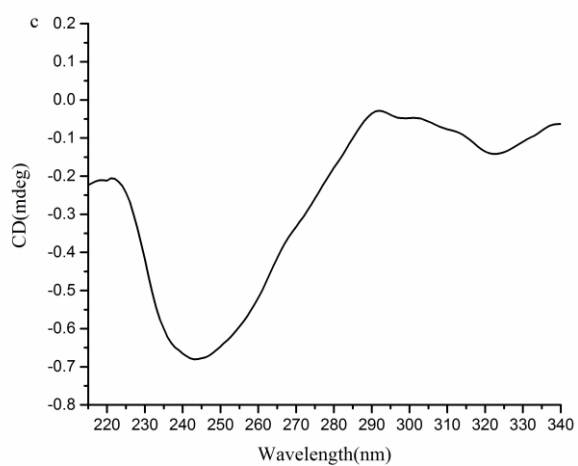

Fig. S4 CD spectroscopy of three kind of signal probes, a, ABEI-AuNFs-BSA-cDNA (OTC), b, ABEI-AuNFs-BSA-cDNA (TET), c, ABEI-AuNFs-BSA-cDNA (Kana)
